# Supplementary material for: The SLC9C2 Gene Product (Na+/H+ Exchanger Isoform 11; NHE11) Is a Testis-Specific Protein Localized to the Head of Mature Mammalian Sperm
Source: MDPI journal article supplement (doi:10.3390/ijms24065329), 2023-03-10
Supplement: s1 [file s1]

**The SLC9C2 gene product (Na<sup>+</sup>/H<sup>+</sup> exchanger isoform 11; NHE11) is a testis-specific protein localized to the head of mature mammalian sperm**

Supplemental Material

|        |      |                                                                         |
|--------|------|-------------------------------------------------------------------------|
| rNHE11 | 1    | MSNNFSFWVARNDNKPDLLCGRPADYFVVQKHFTILICATIVLGGFSRMVLKNSEVFVMIILSVSGFV    |
| hNHE11 | 1    | MSS---YFWAQNESNRPDLLCGQPADYLVEEKHFTTLVCFIVVLGGLLKMLKNCEVIVLTILSLSGFV    |
| rNHE11 | 70   | TGRLAYNFIEVHQIVYPLLKTPSFSLYCYFLPLIVFVAALDVDIFYVKNVFWQVLLTGLISFGTAFATI   |
| hNHE11 | 67   | IGHMAYNSVEVHQIVYPLLRTSFSFSLYSYFSLPIIFMVALDVEFYTLKKMFQVLLTGLISFSTASIII   |
| rNHE11 | 139  | SYVVLKFHEDKNDLQCCLLFSITLGIIDPLHSVNSLKMIGISKMYTDIIRGESLIICSFTCIFFGIFRG   |
| hNHE11 | 136  | GYVVIKFNKDSNDLQSCLLFSITLGIIDPLRSVNSLKTIGISKIYIDLIRGESLIICSIAIFFGNFRG    |
| rNHE11 | 208  | HTTNVSMFRELVIIIGLSFDIFGSAVCGYWCTRVIQIILTDLFSNTLTNVVLCFSLVYMTFFYLVEYFGM  |
| hNHE11 | 205  | NRIHFSIFRDLHVGIELSYDIIGSIIFGYWCAKIIQCILADVFSNMLTNIILCFSMVYMTFFIVEFLGM   |
| rNHE11 | 277  | SGIVALVTVGLNLDLSLFFKPRMEFIITKFLIMCSSVYEHLIYAFFGIVIGOGEEKYFRFHSLVFTVTLF  |
| hNHE11 | 274  | SGTLALAAVGLNLDLSLTFKPKIELVITKFLRIFSSVYEHLIYAFFGIVIGOGELSHYEFHTIPFIFILF  |
| rNHE11 | 346  | VTNVFVRLLTIIILVSPILMHSSYEYDWRWGCVITWSGIRGVFSLLLAPDIYNFSEYKLAAPHMCIFYIQ  |
| hNHE11 | 343  | TTVNLVRLLTIIILVSPILMHSSYEYNWRWGCVITWSGIRGVFNLLWAPDVYNLAERKVEVPQMFILYQ   |
| rNHE11 | 415  | ALSILTTGINSHMMLRSAKTLGLCALSLPRQMAVERNATEHIQEIIIRNTITLTKTEKILTNNVNVVEEK  |
| hNHE11 | 412  | VISLTMGINSYVMTQSARKLDLCVLSLPRQMIQINATQHIQEIVQNTITLTKTEKILTNNVNTLVEDK    |
| rNHE11 | 484  | AKIEYNPILKQARTVPLAHISHGP REESPTDEVLEEERLHVAIIQMSSFEKQCNIGILGVEAARILI    |
| hNHE11 | 481  | TRIEY-----IPFSHVSHNDMKTESTTDEALMEEARLHVAAIQMSSFEKQRNNGILEIEAARILI       |
| rNHE11 | 552  | GATKSYCPHKGFMSSIDVSTYVRARSLIKFKNMLTYLEYHKERVLFVTPGNKLLIFVYRIIISEEF      |
| hNHE11 | 541  | GAAKCYYSIQKGFMSYDVSTYMRTRSLIKFKNVLTFLCYIEKIHFIIPESNTFLTIFIFHIVFSEEF     |
| rNHE11 | 621  | EYATHVVTVMYIFPMIHLWPIARELNVSALISINYYMFLYTLESALKIILIKRKYFLQNWNTLDDFFI    |
| hNHE11 | 610  | EYTGQIINLIYIYPMIHLWPMARGLNVSALISINYYMFLYVLESTLKIILIKRKYFQCNWNTLEFFI     |
| rNHE11 | 690  | IVLGIVDILCMYFVKLRPDSLVLQFTTVVIGYLRVIRFLPIFKIIIPVLINMADVQIKKSLSLMYSITK   |
| hNHE11 | 679  | LVIGIIDIFCVYFVKLRPDNLALIQLTVIMGYLRIRFLPLFKIIPILIRIADVQIKKRLSLMYSITK     |
| rNHE11 | 759  | GYVKSQEDAKLLVRQISGRESIYQKLYDILERNKREAIRELGLIEHEGROVVIALKTKQTIRNVIAKAL   |
| hNHE11 | 748  | GYIKSQEDAKLLIKQIAVCESIYQKLCIEILETNKQDAVKELVLMHEGROVVIALKTKQAIRNVIAKAL   |
| rNHE11 | 828  | KNLTFLWSRGIIDKHGEGIEMNKVLLTKIKALNNFPMAIPPPTPDKYLPNIWVWENKDVLEFFKERTKL   |
| hNHE11 | 817  | KNLTFLCRGIIDKHEVIEINKVLLKKIKALNNFPKAIPPPTPDYILHNIWLEGGKDVLEDFKERAKL     |
| rNHE11 | 897  | TYFDYGDIIICREGEMPQGIYLIISGMASLHSSSATFGIDPSPTTDRQSKTMYTEYCTSGDVLGELSCL   |
| hNHE11 | 886  | ACFDSGDTICKGGEEMPQGIYLIISGMAILHSLSPTFGIESNQR CDRGSSEMETEFCTTGDIIIGELSCL |
| rNHE11 | 966  | LKREIETYAICETTLQAFISLEDLYEGFDVFWPSLEYKMWLKLALSIAHQYFESSIAGEDLKFQKQVM    |
| hNHE11 | 954  | LKREIETYVICETSLQAFISLEDLYEGFDAFWPSLEYKMWLKLALSTAYQYFESSLIEDLRFQNCVM     |
| rNHE11 | 1035 | FNHAYVETLSSYNEMTLNHVNMKLIILVYGNVINSKTEETHVAPCIIPKSCEQIQGISDVSKLLVIPTTS  |
| hNHE11 | 1023 | FNQAYVETLSSYSMIIDNMNTMKFVIIIVYGSVIDTKTEEPYFAPCIIPPTTCEQVQGTSDLSKLLIIQAS |
| rNHE11 | 1104 | EPVKKDATSHDV--VSTGLRTTKDYSWKRKDEFEGGHLFRKTY                             |
| hNHE11 | 1092 | ELTQRNSNTNVMASVNTVFEQPGKNINGRQKMS-----                                  |

### Supplementary Figure S1. Rat and human NHE11 full-length amino acid sequence alignment.

The deduced rat and human NHE11 amino acid sequences from the cloned cDNAs were aligned. Rat and human NHE11 exhibit a 67.10% identity, 78.62% similarity to each other. Black font indicates identical amino acids.

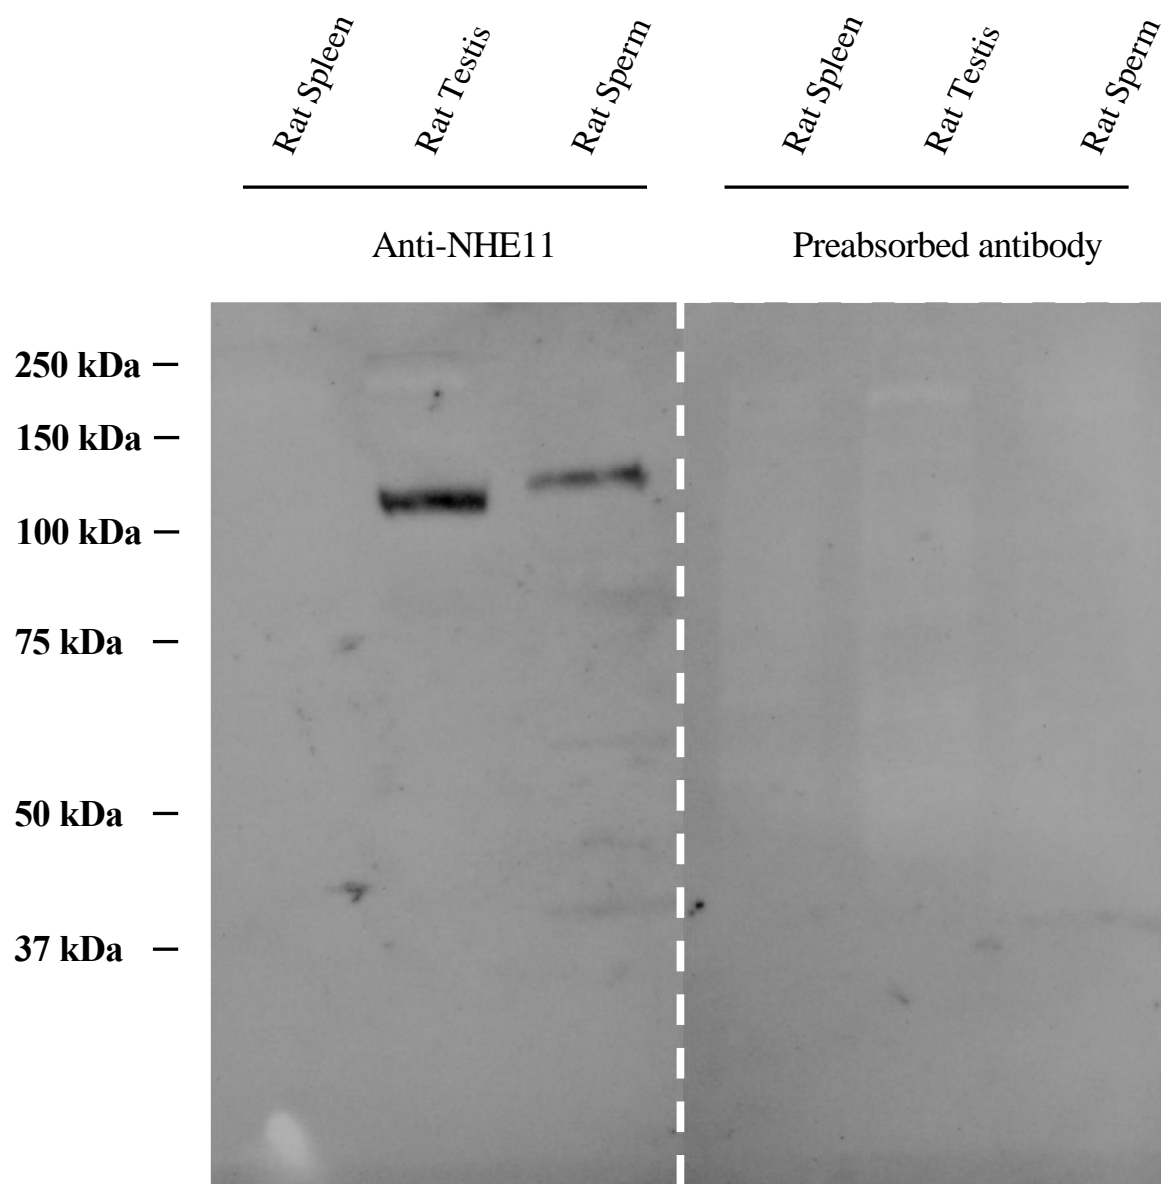

**Supplementary Figure S2. Anti-NHE11 antibody specificity.**

The full immunoblot from Figure 3 is shown here uncropped. A single band in the rat testis and sperm lanes are shown corresponding to the predicted size of NHE11. The NHE11 immunoreactive band was not seen if the anti-NHE11 antibody was preabsorbed with the NHE11 antigenic peptide prior to probing the blot, demonstrating the specificity of this anti-NHE11 antibody and that the immunoreactive band is not a result of non-specific secondary antibody interactions.

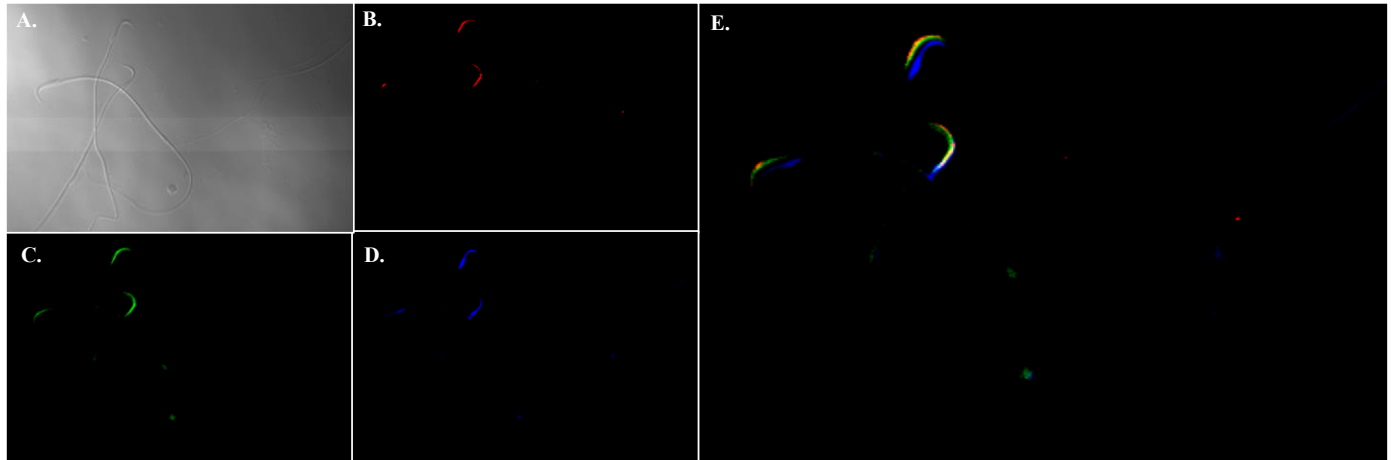

**Supplementary Figure S3. Anti-NHE11 immunocytochemistry on rat sperm cells demonstrates that NHE11 does not localize to the sperm flagellum.**

Immunolocalization of NHE11 in mature rat sperm cells was performed with our anti-NHE11 antibody. A) DIC image of rat sperm cells. B) Anti-NHE11 immunofluorescence (red). C) PNA-FITC staining of the acrosome (green). D) DAPI staining of cell nucleus (blue). E) Merged image of the three color channels (B, C, and D). NHE11 appears to localize to the plasma membrane overlaying the acrosomal region in mature rat sperm cells. There may be some colocalization of NHE11 to the acrosomal region (yellow). Note that there is no observed NHE11 staining of the rat sperm flagellum.

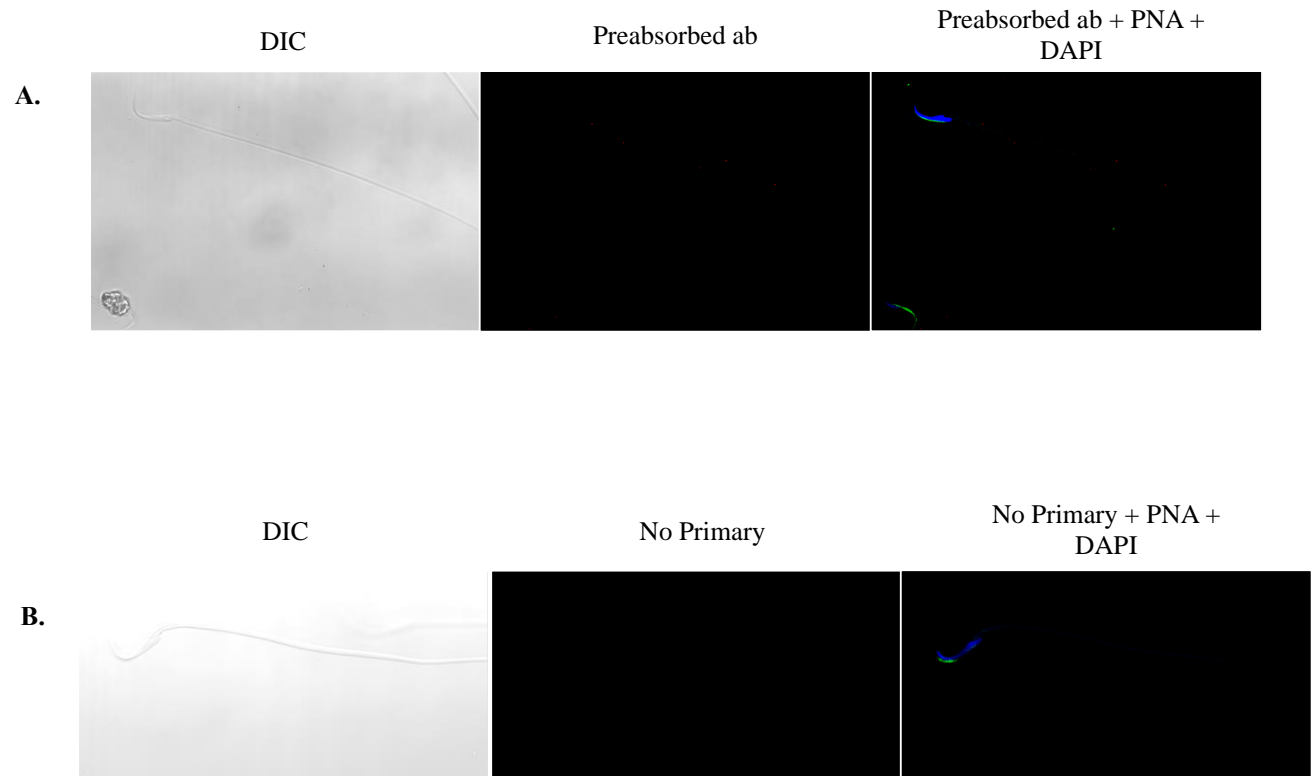

**Supplementary Figure S4. Negative controls for rat sperm immunocytochemistry experiments.**

For negative controls the rat sperm acrosomes and nuclei were stained with PNA-FITC and DAPI respectively, A) the anti-NHE11 antibody was preabsorbed with the antigenic NHE11 peptide and subsequently used for immunocytochemistry or B) the primary antibody was omitted entirely.

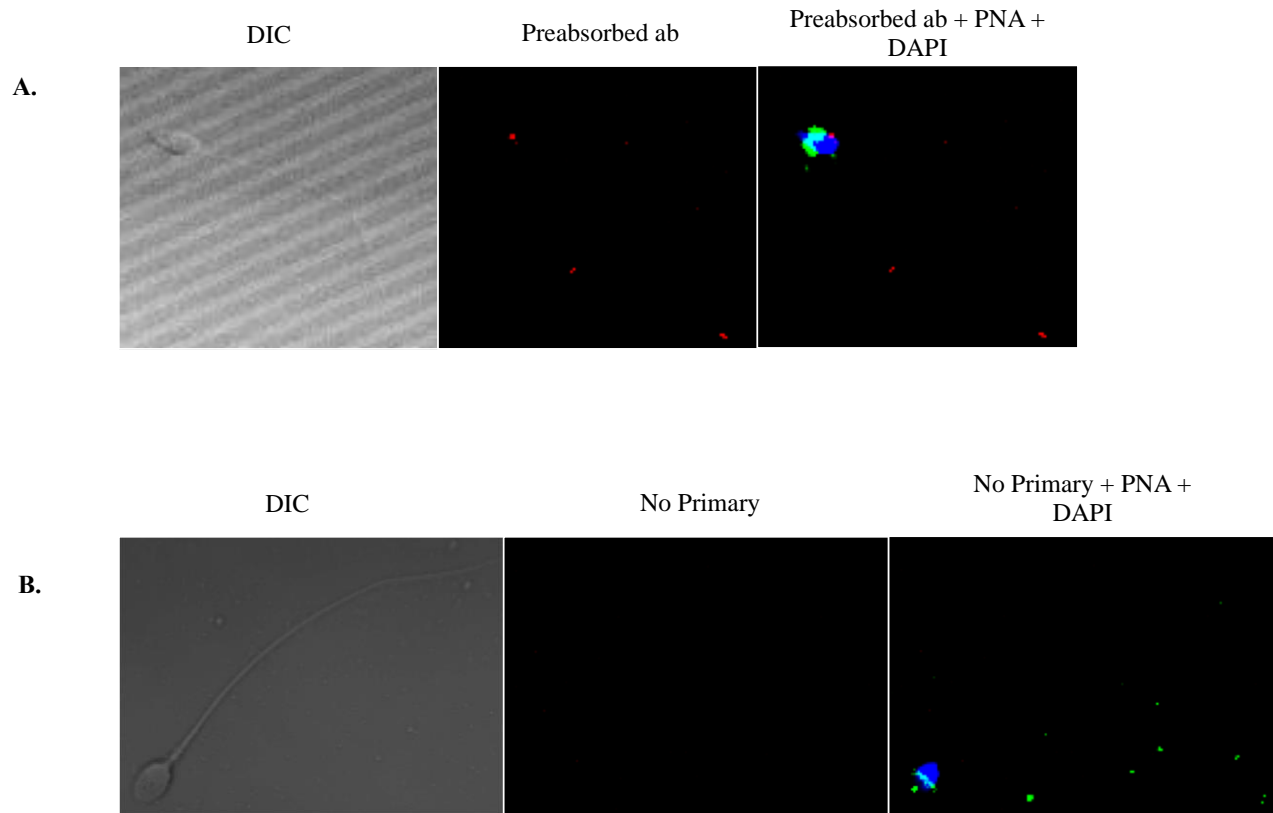

**Supplementary Figure S5. Negative controls for human sperm immunocytochemistry experiments.**

For negative controls the human sperm acrosomes and nuclei were stained with PNA-FITC and DAPI respectively, A) the anti-NHE11 antibody was preabsorbed with the immunizing NHE11 peptide and subsequently used for immunocytochemistry or B) the primary antibody was omitted entirely.
